# Supplementary material for: Dual-purpose tunnel oxide passivated contact on silicon photoelectrodes with high photovoltages for tandem photoelectrochemical devices enabling unassisted water splitting
Source: Royal Society of Chemistry journal article supplement (doi:10.1039/d2ta07996h), 2023-01-01
Supplement: d2ta07996h1.pdf [file d2ta07996h1.pdf]

### Supplementary information

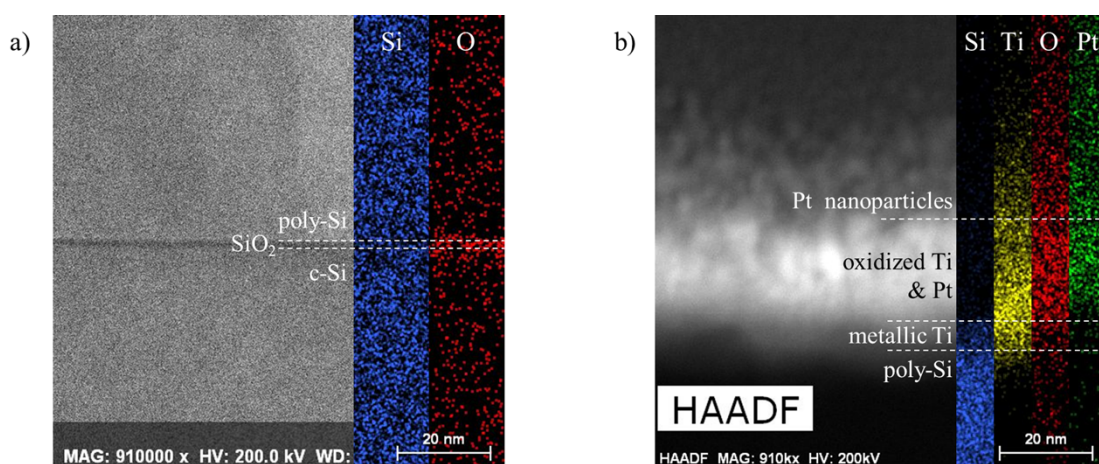

Figure S1 TEM and EDS images on a) SiO<sub>2</sub> tunneling oxide passivation contact and b) Ti protection/Pt catalyst layers.

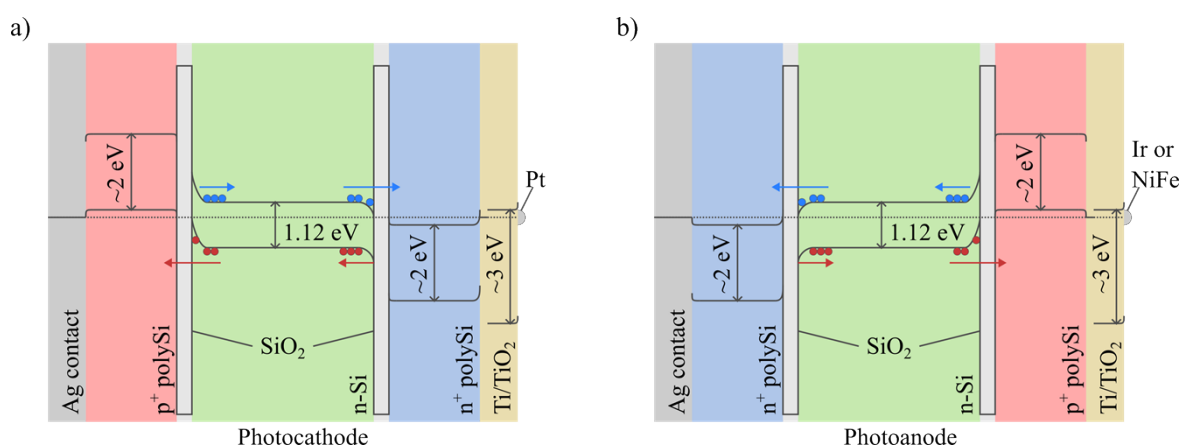

Figure S2 The band diagram of a) photocathode and b) photoanode based on TOPCon Si in dark.

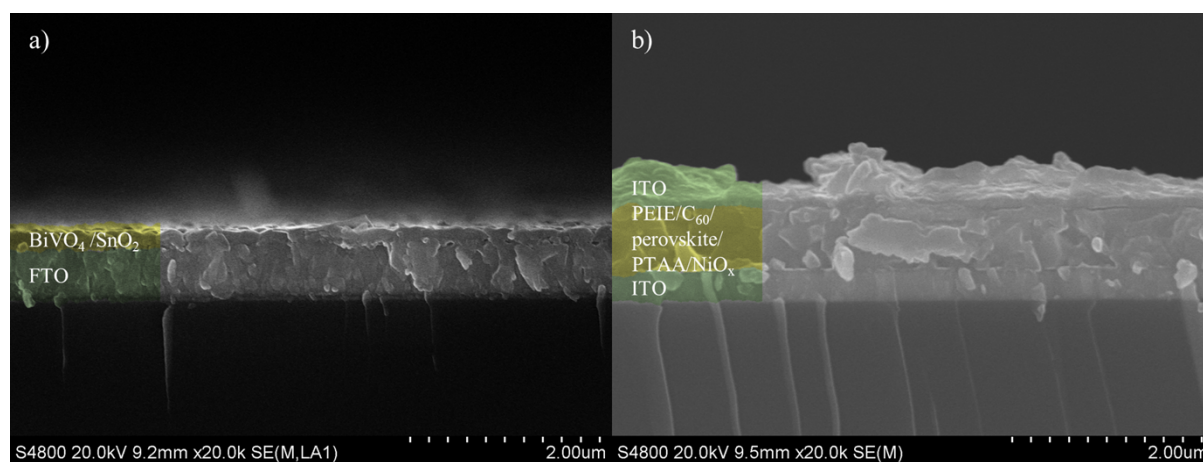

Figure S3 SEM images on a) BiVO<sub>4</sub> photoanode and b) halide perovskite photocathode. The SEM image on halide perovskite is taken before transferring the TiO<sub>2</sub> protection over the halide perovskite cell.

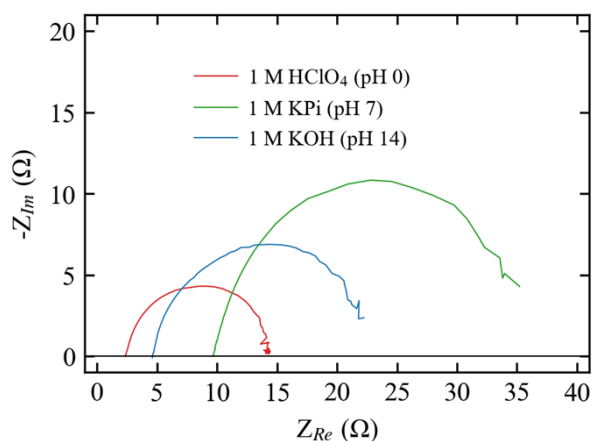

Figure S4 Electrochemical impedance spectroscopy measurements on TOPCon Si photocathodes in various electrolytes over the frequency range of 100 kHz~1 Hz, at 550 mV vs RHE.

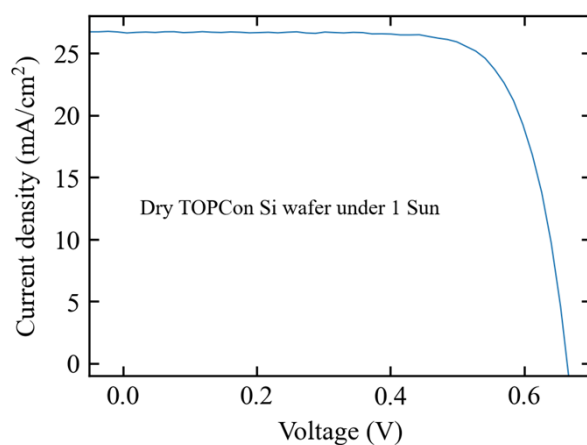

Figure S5 J-V measurement from a dry TOPCon Si wafer showing 664 mV of photovoltage.

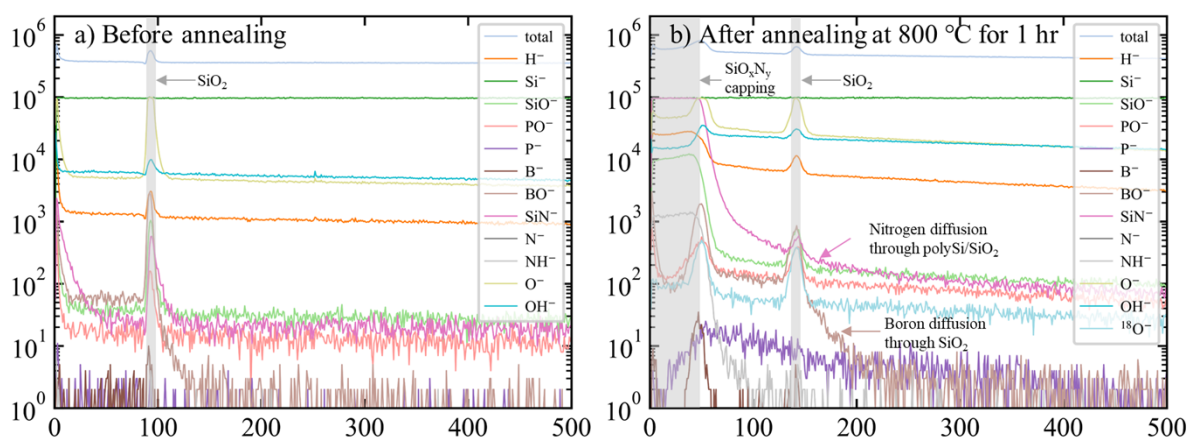

Figure S6 Time-of-flight secondary ion mass spectroscopy (TOF-SIMS) measurement on TOPCon Si a) before and b) after annealing at 800 °C for 1 hour. SiN:H capping layers were removed by hydrofluoric acid (2.5 %) before TOF-SIMS measurements, however, the annealed TOPCon Si sample still has the capping layer because the oxidized capping layer

exhibits a slower etch rate.

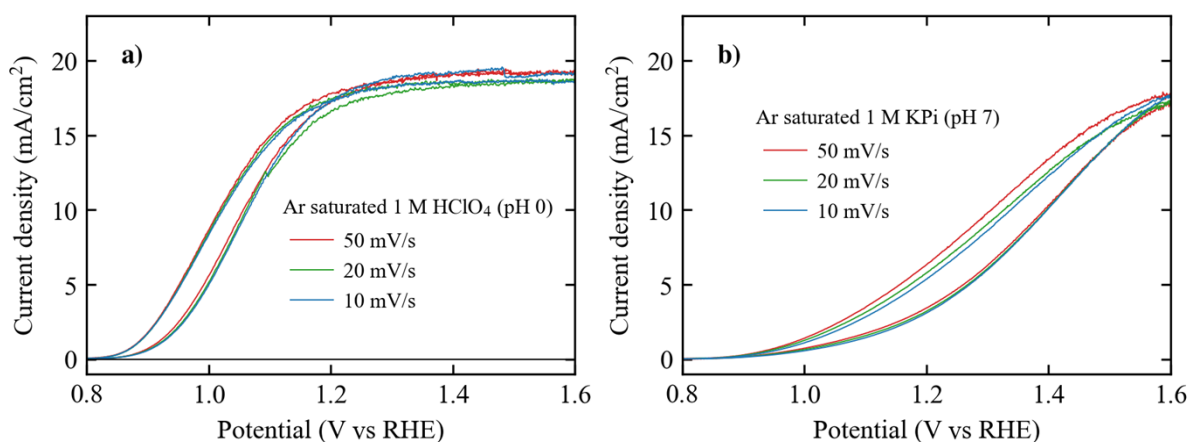

Figure S7 Cyclic voltammetry from a photoanode with Ir catalyst in a) 1 M HClO<sub>4</sub> and b) 1 M KPi were measured with various scan rates. The potential gap between the anodic and cathodic scans is 36 mV (at 5 mA/cm<sup>2</sup>) in 1 M HClO<sub>4</sub> and is not affected by the scan rate. On the other hand, the gap decreases from 104 mV to 84 mV in 1 M KPi.

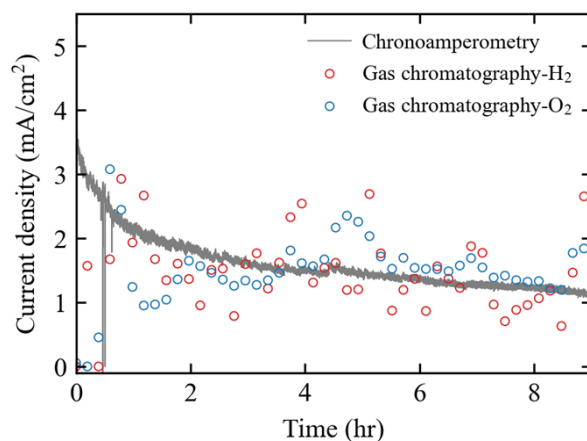

Figure S8 During chronoamperometry of halide perovskite-TOPCon Si photoanode shown in the inset of Figure 6d, H<sub>2</sub> and O<sub>2</sub> products were quantified by gas chromatography (GC) equipped with a thermal conductivity detector and Ar carrier gas. H<sub>2</sub> and O<sub>2</sub> signals were calibrated by using internal standards generating the gases by HER and OER (Pt/Ti or Ir/Ti coated silicon substrates for HER and OER, respectively). Before starting the experiment, the electrochemical cell is saturated with Ar carrier gas to remove H<sub>2</sub> and O<sub>2</sub> background. The flow rate of the carrier gas was 10 sccm (5 sccm for each compartment). The blue and red data points show GC signals in the unit of equivalent current density for easier comparison with the gas chronoamperometry measurement. At the initial moment of the experiment (~ 0.5 hr), there was a time lag between the GC and gas chronoamperometry measurement because it takes time for analytes to diffuse to GC, and it results in a low GC signal at the beginning of the experiment. When calculating Faradaic efficiency, we use a time range between 2 ~ 9 hr to avoid the measurement artifact at the beginning of the experiment. The Faraday efficiency toward HER and OER are 108 and 98 %, respectively. We also consider that the intermittent deviation of the GC signal from chronoamperometry by ~1 mA/cm<sup>2</sup> scale could be related to the bubble stacking and removal on the reaction area.

| Silicon Photocathodes |              |                |                   |                   |                 |
|-----------------------|--------------|----------------|-------------------|-------------------|-----------------|
| Year                  | First author | Electrolyte pH | Photovoltage (mV) | Charge separation | Contact on c-Si |
|                       |              |                |                   |                   |                 |

|                            |                                |                |                   |                   |                                                                   |
|----------------------------|--------------------------------|----------------|-------------------|-------------------|-------------------------------------------------------------------|
| <b>This work</b>           | <b>Moon</b>                    | <b>0</b>       | <b>645±11</b>     | <b>MIS</b>        | <b>Pt/Ti/polySi/SiO<sub>2</sub></b>                               |
| 2013                       | Seger <sup>1</sup>             | 0              | 520               | p-n               | Pt/TiO <sub>2</sub> /Ti                                           |
| 2015                       | Ji <sup>2</sup>                | 0              | 450               | SLJ               | Pt/Ti/SrTiO <sub>3</sub>                                          |
| 2017                       | Bae <sup>3</sup>               | 0              | 584               | MIS               | Pt/TiO <sub>2</sub> /Ti/polySi/SiO <sub>2</sub>                   |
| <b>This work</b>           | <b>Moon</b>                    | <b>7</b>       | <b>636±8</b>      | <b>MIS</b>        | <b>Pt/Ti/polySi/SiO<sub>2</sub></b>                               |
| <b>This work</b>           | <b>Moon</b>                    | <b>14</b>      | <b>641±1</b>      | <b>MIS</b>        | <b>Pt/Ti/polySi/SiO<sub>2</sub></b>                               |
| 2019                       | Cui <sup>4</sup>               | 14             | 500               | p-n               | Pt/TiO <sub>2</sub>                                               |
| 2020                       | Liu <sup>5</sup>               | 0              | 620               | SHJ               | Pt/TiO <sub>2</sub> /a-Si                                         |
| <b>Silicon Photoanodes</b> |                                |                |                   |                   |                                                                   |
| Year                       | First author                   | Electrolyte pH | Photovoltage (mV) | Charge separation | Contact on c-Si                                                   |
| <b>This work</b>           | <b>Moon</b>                    | <b>0</b>       | <b>651±11</b>     | <b>MIS</b>        | <b>Ir/Ti/polySi/SiO<sub>2</sub></b>                               |
| 2015                       | Mei <sup>6</sup>               | 0              | 500               | p-n               | IrO <sub>2</sub> /Ir/TiO <sub>2</sub> /Ti                         |
| 2016                       | Scheuermann <sup>7</sup>       | 0              | 620               | MIS               | Ir/SiO <sub>2</sub>                                               |
| 2016                       | Scheuermann <sup>8</sup>       | 0              | 630               | p-n               | Ir/TiO <sub>2</sub> /SiO <sub>2</sub>                             |
| <b>This work</b>           | <b>Moon</b>                    | <b>7</b>       | <b>647±19</b>     | <b>MIS</b>        | <b>Ir/Ti/polySi/SiO<sub>2</sub></b>                               |
| <b>This work</b>           | <b>Moon</b>                    | <b>14</b>      | <b>649±5.5</b>    | <b>MIS</b>        | <b>Ni<sub>0.8</sub>Fe<sub>0.2</sub>/Ti/polySi/SiO<sub>2</sub></b> |
| 2014                       | Hu <sup>9</sup>                | 14             | 520               | p-n               | Ni/TiO <sub>2</sub>                                               |
| 2015                       | Sun <sup>10</sup>              | 14             | 510               | p-n               | NiO <sub>x</sub>                                                  |
| 2017                       | Yu <sup>11</sup>               | 14             | 490               | SLJ               | Co(OH) <sub>2</sub> /TiO <sub>2</sub>                             |
| 2018                       | Moreno-Hernandez <sup>12</sup> | 14             | 620               | MIS               | Ni/SnO <sub>x</sub> /SiO <sub>x</sub>                             |
| 2018                       | Digdaya <sup>13</sup>          | 14             | 538               | MIS               | Ni/Pt/Al <sub>2</sub> O <sub>3</sub> /SiO <sub>x</sub>            |
| 2015                       | Wang <sup>14</sup>             | 14             | 637               | SHJ               | Ni/ITO/p:a-Si:H/i:a-Si:H                                          |
| 2020                       | Hemmerling <sup>15</sup>       | 14             | 480               | MIS               | Ir/HfO <sub>2</sub>                                               |
| 2020                       | Chuang <sup>16</sup>           | 14             | 570               | MIS               | Ni/TiO <sub>2</sub>                                               |

Table S1 Table of photovoltages measured from Si photoelectrodes.

| <b>Tandem PEC devices with crystalline silicon bottom cell</b> |                            |                                 |                            |             |                                                |
|----------------------------------------------------------------|----------------------------|---------------------------------|----------------------------|-------------|------------------------------------------------|
| Year                                                           | First author               | Top cell (band gap, eV)         | Bottom cell (band gap, eV) | STH (%)     | Lifetime-H <sub>2</sub> (ml cm <sup>-2</sup> ) |
| <b>This work</b>                                               | <b>Moon</b>                | <b>BiVO<sub>4</sub> (2.4)</b>   | <b>Si (1.12)</b>           | <b>0.24</b> | <b>1.5</b>                                     |
| <b>This work</b>                                               | <b>Moon</b>                | <b>Halide perovskite (1.68)</b> | <b>Si (1.12)</b>           | <b>3.6</b>  | <b>6</b>                                       |
| 2013                                                           | Liu <sup>17</sup>          | TiO <sub>2</sub> NW (3.2)       | Si nanowire (1.12)         | 0.12        | 0.44                                           |
| 2016                                                           | Xu <sup>18</sup>           | BiVO <sub>4</sub> (2.4)         | Si nanowire (1.12)         | 0.2         | 0.18                                           |
| 2017                                                           | Chakthranont <sup>19</sup> | BiVO <sub>4</sub> (2.4)         | Si nanowire (1.12)         | 0.45        | 0.13                                           |
| 2019                                                           | Vijselaar <sup>20</sup>    | Cu <sub>2</sub> O (2.0)         | Si nanowire (1.12)         | 0           | N/A                                            |
| <b>Tandem PEC devices based on earth-abundant materials</b>    |                            |                                 |                            |             |                                                |
| Year                                                           | First author               | Top cell (band gap)             | Bottom cell (band gap)     | STH (%)     | Lifetime-H <sub>2</sub> (ml cm <sup>-2</sup> ) |
| 1988                                                           | Sakai <sup>21</sup>        | a-Si (N/A)                      | a-Si (N/A)                 | 1.98        | N/A                                            |

|      |                      |                                      |                                       |      |       |
|------|----------------------|--------------------------------------|---------------------------------------|------|-------|
| 2006 | Ingler <sup>22</sup> | Fe <sub>2</sub> O <sub>3</sub> (2.0) | Fe <sub>2</sub> O <sub>3</sub> (2.0)  | 0.11 | N/A   |
| 2014 | Bornoz <sup>23</sup> | BiVO <sub>4</sub> (2.4)              | Cu <sub>2</sub> O (2.0)               | 0.5  | 0.053 |
| 2018 | Shao <sup>24</sup>   | TiO <sub>2</sub> (3.2)               | P <sub>3</sub> HT:PCBM (1.9)          | 0.16 | 0.22  |
| 2018 | Pan <sup>25</sup>    | BiVO <sub>4</sub> (2.4)              | Cu <sub>2</sub> O (2.0)               | 3    | 12.5  |
| 2020 | Yang <sup>26</sup>   | BiVO <sub>4</sub> (2.4)              | Sb <sub>2</sub> S <sub>3</sub> (1.2)  | 1.5  | 4.2   |
| 2021 | Zhang <sup>27</sup>  | BiVO <sub>4</sub> (2.4)              | Cu <sub>2</sub> O (2.0)               | 3.2  | 2.2   |
| 2021 | Huang <sup>28</sup>  | BiVO <sub>4</sub> (2.4)              | CZTS (1.5)                            | 3.17 | 20.9  |
| 2021 | Ye <sup>29</sup>     | BiVO <sub>4</sub> (2.4)              | PBDB-T:ITIC:PC <sub>71</sub> BM (1.7) | 4.3  | 1.3   |

Table S2. Table of STH efficiency and lifetime H<sub>2</sub> measured from PEC devices based on two or three photoabsorbers. Lifetime-H<sub>2</sub> represents the total amount of hydrogen produced over the lifetime of a PEC device. The lifetime-H<sub>2</sub> refers to a stability test with gas collection (e.g. gas chromatography) when it is available or was estimated from the amount of electrical charge passed during a chronoamperometry.

## References

- 1 B. Seger, D. S. Tilley, T. Pedersen, P. C. K. Vesborg, O. Hansen, M. Grätzel and I. Chorkendorff, *RSC Adv.*, 2013, **3**, 25902.
- 2 L. Ji, M. D. McDaniel, S. Wang, A. B. Posadas, X. Li, H. Huang, J. C. Lee, A. A. Demkov, A. J. Bard, J. G. Ekerdt and E. T. Yu, *Nat. Nanotechnol.*, 2015, **10**, 84–90.
- 3 D. Bae, T. Pedersen, B. Seger, B. Iandolo, O. Hansen, P. C. K. Vesborg and I. Chorkendorff, *Catal. Today*, 2017, **290**, 59–64.
- 4 W. Cui, T. Moehl, S. Siol and S. D. Tilley, *Sustain. Energy Fuels*, 2019, **3**, 3085–3092.
- 5 B. Liu, S. Feng, L. Yang, C. Li, Z. Luo, T. Wang and J. Gong, *Energy Environ. Sci.*, 2020, **13**, 221–228.
- 6 B. Mei, T. Pedersen, P. Malacrida, D. Bae, R. Frydendal, O. Hansen, P. C. K. Vesborg, B. Seger and I. Chorkendorff, *J. Phys. Chem. C*, 2015, **119**, 15019–15027.
- 7 A. G. Scheuermann, J. P. Lawrence, K. W. Kemp, T. Ito, A. Walsh, C. E. D. Chidsey, P. K. Hurley and P. C. McIntyre, *Nat. Mater.*, 2016, **15**, 99–105.
- 8 A. G. Scheuermann, J. P. Lawrence, A. C. Meng, K. Tang, O. L. Hendricks, C. E. D. Chidsey and P. C. McIntyre, *ACS Appl. Mater. Interfaces*, 2016, **8**, 14596–14603.
- 9 S. Hu, M. R. Shaner, J. A. Beardslee, M. Lichterman, B. S. Brunschwig and N. S. Lewis, *Science (80-. )*, 2014, **344**, 1005–1009.
- 10 K. Sun, M. T. McDowell, A. C. Nielander, S. Hu, M. R. Shaner, F. Yang, B. S. Brunschwig and N. S. Lewis, *J. Phys. Chem. Lett.*, 2015, **6**, 592–598.
- 11 Y. Yu, Z. Zhang, X. Yin, A. Kvit, Q. Liao, Z. Kang, X. Yan, Y. Zhang and X. Wang, *Nat. Energy*, 2017, **2**, 17045.
- 12 I. A. Moreno-Hernandez, B. S. Brunschwig and N. S. Lewis, *Adv. Energy Mater.*, 2018, **8**, 1801155.
- 13 I. A. Digdaya, B. J. Trzeźniewski, G. W. P. Adhyaksa, E. C. Garnett and W. A. Smith, *J. Phys. Chem. C*, 2018, **122**, 5462–5471.
- 14 H.-P. Wang, K. Sun, S. Y. Noh, A. Kargar, M.-L. Tsai, M.-Y. Huang, D. Wang and J.-H. He, *Nano Lett.*, 2015, **15**, 2817–2824.
- 15 J. Hemmerling, J. Quinn and S. Linic, *Adv. Energy Mater.*, 2020, **10**, 1903354.
- 16 C.-H. Chuang, Y.-Y. Lai, C.-H. Hou and Y.-J. Cheng, *ACS Appl. Energy Mater.*, 2020, **3**, 3902–3908.
- 17 C. Liu, J. Tang, H. M. Chen, B. Liu and P. Yang, *Nano Lett.*, 2013, **13**, 2989–2992.
- 18 P. Xu, J. Feng, T. Fang, X. Zhao, Z. Li and Z. Zou, *RSC Adv.*, 2016, **6**, 9905–9910.
- 19 P. Chakthranont, T. R. Hellstern, J. M. McEnaney and T. F. Jaramillo, *Adv. Energy Mater.*, 2017, **7**, 1701515.

- 20 W. Vijeelaar, P. P. Kunturu, T. Moehl, S. D. Tilley and J. Huskens, *ACS Energy Lett.*, 2019, **4**, 2287–2294.
- 21 Y. Sakai, S. Sugahara, M. Matsumura, Y. Nakato and H. Tsubomura, *Can. J. Chem.*, 1988, **66**, 1853–1856.
- 22 W. B. Ingler and S. U. M. Khan, *Electrochem. Solid-State Lett.*, 2006, **9**, G144.
- 23 P. Borno, F. F. Abdi, S. D. Tilley, B. Dam, R. van de Krol, M. Graetzel and K. Sivula, *J. Phys. Chem. C*, 2014, **118**, 16959–16966.
- 24 D. Shao, L. Zheng, D. Feng, J. He, R. Zhang, H. Liu, X. Zhang, Z. Lu, W. Wang, W. Wang, F. Lu, H. Dong, Y. Cheng, H. Liu and R. Zheng, *J. Mater. Chem. A*, 2018, **6**, 4032–4039.
- 25 L. Pan, J. H. Kim, M. T. Mayer, M.-K. Son, A. Ummadisingu, J. S. Lee, A. Hagfeldt, J. Luo and M. Grätzel, *Nat. Catal.*, 2018, **1**, 412–420.
- 26 W. Yang, J. H. Kim, O. S. Hutter, L. J. Phillips, J. Tan, J. Park, H. Lee, J. D. Major, J. S. Lee and J. Moon, *Nat. Commun.*, 2020, **11**, 861.
- 27 Y. Zhang, H. Lv, Z. Zhang, L. Wang, X. Wu and H. Xu, *Adv. Mater.*, 2021, **33**, 2008264.
- 28 D. Huang, K. Wang, L. Li, K. Feng, N. An, S. Ikeda, Y. Kuang, Y. Ng and F. Jiang, *Energy Environ. Sci.*, 2021, **14**, 1480–1489.
- 29 S. Ye, W. Shi, Y. Liu, D. Li, H. Yin, H. Chi, Y. Luo, N. Ta, F. Fan, X. Wang and C. Li, *J. Am. Chem. Soc.*, 2021, **143**, 12499–12508.
